# Supplementary material for: Tanscriptomic Study of the Soybean-Fusarium virguliforme Interaction Revealed a Novel Ankyrin-Repeat Containing Defense Gene, Expression of Whose during Infection Led to Enhanced Resistance to the Fungal Pathogen in Transgenic Soybean Plants
Source: PLoS One. 2016 Oct 19;11(10):e0163106. doi: 10.1371/journal.pone.0163106 (PMC5070833; doi:10.1371/journal.pone.0163106)
Supplement: S1 Dataset — (XLSX) [file pone.0163106.s013.xlsx]

## Sheet: Sheet1
S1 Dataset. Genes up-regulated in soybean roots infected by Fusarium virguliformeat early time periods.
Locus ID	RPKM		Fold change	P-value	Functional Annotation
	S1	S3
Glyma.20g152500	0.133837	2.40245	17.9506	9.18804e-05	3-ketoacyl-CoA synthase 6
Glyma.07g230300	0.0343783	1.01197	29.4364	0.000490156	60S RIBOSOMAL PROTEIN L34
Glyma.06g149100	0.718377	10.5182	14.6416	1.57766e-05	Alginate lyase
Glyma.11g091600	0.788395	14.0864	17.8672	5.56993e-09	AMP DEPENDENT LIGASE/SYNTHETASE,
Glyma.07g061500	0.0349531	0.56334	16.117	0.000400057	apoptosis
Glyma.04g003100	0.217897	3.712	17.0356	4.30438e-05	Arabidopsis phospholipase-like protein (PEARLI 4)
Glyma.04g099200	0.81218	10.5336	12.9695	1.9735e-05	aspartic-type endopeptidase activity
Glyma.10g184700	46.5434	445.564	9.57306	8.96335e-07	Aspartyl protease
Glyma.17g041200	0.444941	16.7839	37.7216	1.38235e-10	ATP-BINDING CASSETTE TRANSPORTER
Glyma.15g012000	2.56187	42.3559	16.5332	6.45759e-09	ATP-BINDING CASSETTE TRANSPORTER, Pleiotropic drug resistance proteins (PDR1-15)
Glyma.19g099700	0.234388	2.30707	9.84294	0.000699356	B-box type zinc finger protein with CCT domain
Glyma.09g231500	0.255862	3.10009	12.1162	2.54128e-05	Beta-fructofuranosidase (invertase)
Glyma.13g349300	1.22534	14.4909	11.826	1.96753e-07	Beta-fructofuranosidase (invertase)
Glyma.15g024600	3.8009	42.7066	11.2359	2.27728e-08	Beta-fructofuranosidase (invertase)
Glyma.07g151900	0.813486	12.3851	15.2248	5.66573e-08	Beta-glucosidase
Glyma.18g052600	0.86552	8.35932	9.65817	0.000337442	Bifunctional inhibitor/lipid-transfer protein/seed storage 2S albumin superfamily protein
Glyma.12g234600	0.205871	2.64274	12.8369	0.000288574	bile acid:sodium symporter activity
Glyma.06g220800	0.497481	35.5762	71.5128	1.17057e-10	blue-copper-binding protein
Glyma.10g290200	0.356032	10.2703	28.8466	2.91542e-07	C2H2 and C2HC zinc fingers superfamily protein
Glyma.20g099100	3.07191	29.9185	9.73938	4.10771e-06	C2H2 and C2HC zinc fingers superfamily protein
Glyma.10g295200	3.3444	34.2179	10.2314	1.70125e-07	C2H2-like zinc finger protein
Glyma.17g244000	0.0306683	11.6665	380.407	0.000394839	Ca2+-independent phospholipase A2
Glyma.14g081300	2.39831	25.2406	10.5244	2.90064e-07	Ca2+-independent phospholipase A2, lipid metabolic process
Glyma.19g201400	0.0811529	2.3598	29.0785	2.17743e-05	CALCIUM/CALMODULIN-DEPENDENT PROTEIN KINASE-RELATED
Glyma.18g286800	1.1184	11.1434	9.96369	6.01952e-06	Calcium-binding EF-hand family protein
Glyma.02g143800	0.805667	9.38152	11.6444	0.000528605	Calmodulin and related proteins (EF-Hand superfamily); calcium binding
Glyma.11g196600	0.234755	4.9471	21.0735	4.18272e-05	CARBONIC ANHYDRASE
Glyma.16g162500	0.0103593	16.9738	1638.55	6.51762e-05	Carbon-sulfur lyase activity; SUBGROUP I AMINOTRANSFERASE RELATED Pyridoxal phosphate (PLP)-dependent transferases superfamily protein JG
Glyma.16g162400	1.00012	103.793	103.781	0	Carbon-sulfur lyase activity; SUBGROUP I AMINOTRANSFERASE RELATED Pyridoxal phosphate (PLP)-dependent transferases superfamily protein JG
Glyma.13g346700	2.7335	218.146	79.8046	6.37346e-11	Chitinase -related protein
Glyma.03g247500	7.70017	364.843	47.3811	9.72333e-13	Chitinase related; defense response to fungus; pathogenesis-related
Glyma.17g076100	0.0643931	1.928	29.9412	0.00029488	Chitinase, Glycosyl hydrolases family 18
Glyma.11g124500	7.34558	163.992	22.3253	5.60072e-11	Chitinase-related
Glyma.02g007400	1.46436	30.3113	20.6994	1.0848e-09	CHITINASE-RELATED
Glyma.08g156300	1.38647	22.1056	15.9438	2.39223e-09	CYSTEINE DESULFURYLASE
Glyma.10g253600	0.74726	57.4594	76.8935	2.16671e-12	Cysteine-rich RLK (RECEPTOR-like protein kinase) 29 JGI
Glyma.15g115300	0.983367	41.3404	42.0397	2.41516e-11	cysteine-type endopeptidase inhibitor activity
Glyma.18g003700	0.785703	12.8674	16.3769	5.19093e-06	cysteine-type endopeptidase inhibitor activity
Glyma.05g022100	6.72814	145.99	21.6984	1.32265e-09	Cytochrome P450
Glyma.15g203500	1.79948	631.561	350.969	7.54006e-11	Cytochrome P450 CYP2
Glyma.02g156100	0.964705	141.532	146.71	0	Cytochrome P450 CYP2
Glyma.06g202300	0.392591	43.1151	109.822	4.44089e-16	Cytochrome P450 CYP2
Glyma.09g048700	2.25514	120.643	53.4968	5.57332e-14	Cytochrome P450 CYP2
Glyma.10g114600	4.80567	256.94	53.466	5.07874e-11	Cytochrome P450 CYP2
Glyma.08g140600	4.6484	204.497	43.9929	8.69322e-10	Cytochrome P450 CYP2
Glyma.09g049200	7.08085	249.615	35.2522	1.073e-08	Cytochrome P450 CYP2
Glyma.11g051800	2.65176	70.6246	26.6331	5.28777e-11	Cytochrome P450 CYP2
Glyma.10g115400	0.407137	10.3488	25.4184	1.61276e-08	Cytochrome P450 CYP2
Glyma.09g048900	2.62272	64.8806	24.7379	1.14901e-11	Cytochrome P450 CYP2
Glyma.09g049300	9.12371	221.523	24.2799	1.87294e-08	Cytochrome P450 CYP2
Glyma.10g115700	0.465447	9.08149	19.5113	8.89243e-08	Cytochrome P450 CYP2
Glyma10g12700*	0.477679	8.93316	18.7012	1.25949e-07	Cytochrome P450 CYP2
Glyma10g12710*	0.452558	8.04573	17.7784	2.06087e-07	Cytochrome P450 CYP2
Glyma.10g115300	0.470066	8.14344	17.324	5.11745e-07	Cytochrome P450 CYP2
Glyma10g22060*	0.378001	6.52894	17.2722	1.17258e-06	Cytochrome P450 CYP2
Glyma10g22090*	0.209688	3.52854	16.8275	3.30068e-05	Cytochrome P450 CYP2
Glyma.10g116000	0.249385	3.88178	15.5654	5.58351e-05	Cytochrome P450 CYP2
Glyma.02g156000	0.801109	11.6174	14.5016	2.28783e-07	Cytochrome P450 CYP2
Glyma.18g080400	2.13353	178.734	83.7734	1.03695e-13	Cytochrome P450 CYP2 subfamily
Glyma.20g018900	0.0278212	1.44144	51.8108	0.000455922	Cytochrome P450 CYP2 subfamily
Glyma.13g265300	0.0869339	3.06725	35.2825	1.83929e-05	Cytochrome P450 CYP2 subfamily
Glyma.15g156100	18.7728	583.781	31.0971	0.000211913	Cytochrome P450 CYP2 subfamily
Glyma.05g042800	0.0739728	2.25731	30.5155	4.40322e-05	Cytochrome P450 CYP2 subfamily
Glyma.19g146800	1.20894	25.7439	21.2947	2.25429e-10	Cytochrome P450 CYP2 subfamily
Glyma.16g195600	15.6917	240.41	15.3208	5.35599e-06	Cytochrome P450 CYP2 subfamily
Glyma.01g135200	15.4343	228.324	14.7933	4.59586e-06	Cytochrome P450 CYP2 subfamily
Glyma.17g125300	0.104781	1.54286	14.7246	0.000313502	Cytochrome P450 CYP2 subfamily
Glyma.10g115200	0.195128	2.67256	13.6964	0.000214285	Cytochrome P450 CYP2 subfamily
Glyma.13g068800	0.974206	13.1499	13.4981	1.40365e-07	Cytochrome P450 CYP2 subfamily
Glyma.19g014600	1.83625	24.5067	13.346	1.3795e-08	Cytochrome P450 CYP2 subfamily
Glyma.11g062500	33.1505	356.835	10.7641	0.000581156	Cytochrome P450 CYP2 subfamily
Glyma.14g015100	0.956584	9.75754	10.2004	2.68841e-06	Cytochrome P450 CYP2 subfamily
Glyma.19g151200	9.33736	120.5	12.9052	6.16151e-09	Disease resistance-responsive (dirigent-like protein) family protein
Glyma.05g124900	1.08185	22.3293	20.64	7.23563e-10	D-LACTATE DEHYDROGENASE
Glyma.19g175200	0.230267	3.37227	14.645	6.97094e-06	Exocyst component protein and related proteins
Glyma.01g005100	3.1402	111.806	35.6046	6.9349e-12	Family of unknown function (DUF706)
Glyma.19g081700	0.176693	4.18052	23.6599	7.59612e-06	F-box and associated interaction domains-containing protein
Glyma.02g094600	0.375751	5.21652	13.8829	0.000105655	F-box family protein
Glyma.10g290500	0.503222	5.06385	10.0629	9.7913e-05	F-box family protein
Glyma.07g262300	0.0572236	1.87051	32.6876	0.000487724	F-box family protein with a domain of unknown function (DUF295)
Glyma.07g262400	0.120879	2.64801	21.9062	0.000170581	F-box family protein with a domain of unknown function (DUF295)
Glyma.09g004900	0.482631	4.877	10.105	5.40641e-05	F-box family protein with a domain of unknown function (DUF295)
Glyma.09g269400	1.51111	59.6427	39.4693	1.03229e-12	Flavonol reductase/cinnamoyl-CoA reductase
Glyma.12g238200	0.229281	3.11361	13.5799	0.000125547	Flavonol reductase/cinnamoyl-CoA reductase
Glyma.04g123800	1.40288	39.2172	27.9547	4.55547e-12	formate acetyltransferase activating enzyme
Glyma.14g023000	0.333188	3.66556	11.0014	0.000246151	GERANYLGERANYL PYROPHOSPHATE SYNTHASE, geranylgeranyl reductase
Glyma.19g057700	6.00914	111.182	18.5021	2.03628e-09	germin-like protein; nutrient reservoir activity
Glyma.02g088800	0.231749	9.30182	40.1375	3.11374e-09	Glutamine amidotransferase class-I
Glyma.08g174700	0.128699	2.52723	19.6367	0.000479493	Glutathione S-transferase
Glyma.08g174900	35.8979	527.728	14.7008	1.99565e-05	Glutathione S-transferase
Glyma.08g174600	0.568956	7.29981	12.8302	0.000482384	Glutathione S-transferase
Glyma.02g024600	3.2308	31.497	9.74897	3.27631e-07	Glutathione S-transferase
Glyma.16g097200	1.0818	15.1135	13.9706	4.72651e-08	Glycosyl hydrolase family 1
Glyma.16g201800	0.401425	6.03586	15.0361	6.85827e-06	HXXXD-type acyl-transferase family protein
Glyma.09g281800	30.1406	330.558	10.9673	4.30216e-05	Hydroxyindole-O-methyltransferase and related SAM-dependent methyltransferases
Glyma.04g217400	0.538869	7.78888	14.4541	4.2916e-06	Integrase-type DNA-binding superfamily protein
Glyma.05g137800	0.0838677	20.6238	245.909	7.83045e-10	Iron/ascorbate family oxidoreductases
Glyma.01g056100	2.8822	117.859	40.8921	1.99396e-13	Iron/ascorbate family oxidoreductases
Glyma.03g057100	0.22053	2.64221	11.9812	0.000446851	Iron/ascorbate family oxidoreductases
Glyma.03g187900	0.915997	10.4591	11.4183	2.54529e-06	Iron/ascorbate family oxidoreductases
Glyma.09g162600	8.67032	216.9	25.0164	1.29787e-11	Kunitz family trypsin and protease inhibitor protein
Glyma.09g162500	49.6912	1050.71	21.1448	0.000533987	Kunitz family trypsin and protease inhibitor protein
Glyma.09g163100	1.56926	26.5452	16.9157	7.46523e-07	Kunitz family trypsin and protease inhibitor protein
Glyma.09g163200	32.5574	475.184	14.5953	2.71342e-07	Kunitz family trypsin and protease inhibitor protein
Glyma.09g163300	55.7614	544.252	9.76033	4.79013e-05	Kunitz family trypsin and protease inhibitor protein
Glyma.01g210400	2.77005	38.2355	13.8032	9.44109e-09	lactate/malate dehydrogenase
Glyma.15g145600	27.8368	373.909	13.4322	2.12935e-07	Late embryogenesis abundant protein, Pathogenesis-related protein Bet v I family
Glyma.09g061500	0.295006	3.6267	12.2936	7.76827e-05	LEUCINE-RICH REPEAT-CONTAINING PROTEIN
Glyma.08g334500	0.408334	3.88029	9.50272	0.000459977	maternal effect embryo arrest 59
Glyma.16g146700	1.22014	12.3947	10.1584	2.31643e-06	Mitochondrial carrier protein
Glyma.09g040400	17.9305	280.124	15.6228	1.09066e-08	MLP-like protein 423, Pathogenesis-related protein Bet v I family
Glyma.14g130000	2.83041	28.4239	10.0423	9.43349e-08	molybdate transporter 1
Glyma.U027300*	5.57718	82.2164	14.7416	5.0039e-09	Multicopper oxidase
Glyma.12g099300	0.678301	11.7491	17.3214	3.35838e-08	MULTIDRUG RESISTANCE PUMP, antiporter activity, MATE efflux family protein
Glyma.08g042100	0.487283	4.97644	10.2126	9.91807e-05	MYB-RELATED transcription factor
Glyma.08g169400	1.19857	14.115	11.7765	0.000769089	NAC (No Apical Meristem) domain transcriptional regulator superfamily protein
Glyma.18g110700	0.540116	8.60775	15.9369	2.32286e-06	NAC domain containing protein 42
Glyma.15g223900	3.43947	55.1902	16.0461	8.45327e-10	NADH:flavin oxidoreductase / NADH oxidase family
Glyma.13g186200	1.43363	14.6626	10.2276	2.42658e-06	NADH:flavin oxidoreductase / NADH oxidase family
Glyma.10g161500	8.32018	598.493	71.9329	2.13876e-11	Neurogenic locus notch protein-like OS=Zea mays
Glyma.04g230400	14.1142	179.841	12.7418	7.20187e-09	none
Glyma.03g147800	0.356108	23.7961	66.8229	8.80817e-10	NUCLEOPORIN-RELATED; Disease resistance-responsive (dirigent-like protein) family protein
Glyma.03g147700	41.8733	916.891	21.8968	5.11434e-08	NUCLEOPORIN-RELATED; Disease resistance-responsive (dirigent-like protein) family protein
Glyma.03g044900	13.8031	243.53	17.6432	1.48198e-09	NUCLEOPORIN-RELATED; Disease resistance-responsive (dirigent-like protein) family protein
Glyma03g30380*	36.923	553.385	14.9875	2.86537e-08	NUCLEOPORIN-RELATED; Disease resistance-responsive (dirigent-like protein) family protein
Glyma.01g126700	0.900374	12.2111	13.5623	1.02317e-05	NUCLEOPORIN-RELATED; Disease resistance-responsive (dirigent-like protein) family protein
Glyma.03g107500	0.411321	9.63697	23.4293	7.72852e-08	Nucleotide-diphospho-sugar transferase
Glyma.17g096400	0.147629	3.71998	25.1982	2.01555e-06	OLIGOPEPTIDE TRANSPORTER-RELATED
Glyma.18g260000	0.326393	4.76904	14.6114	2.87815e-06	OLIGOPEPTIDE TRANSPORTER-RELATED
Glyma.05g147000	5.31139	433.106	81.543	1.07329e-10	O-methyltransferase
Glyma.12g161400	0.264615	11.7587	44.437	7.45233e-08	oxidation-reduction process, vacuolar membrane, plasma membrane, flavodoxin, coenzyme binding
Glyma.12g141900	7.23508	80.6587	11.1483	3.24377e-08	oxidation-reduction process, vacuolar membrane, plasma membrane, flavodoxin, coenzyme binding
Glyma.03g029000	0.0481918	8.5993	178.439	3.04142e-08	Pectinesterase
Glyma.01g138000	0.396127	44.0677	111.246	4.44089e-16	Pectinesterase
Glyma.01g138100	0.395609	37.0456	93.6418	3.33067e-15	Pectinesterase.
Glyma.03g038500	2.43385	173.764	71.3949	1.55431e-15	Peroxidase
Glyma.01g130500	1.59413	80.8776	50.7347	3.81917e-14	Peroxidase
Glyma.03g038100	7.34713	315.218	42.9037	2.6358e-09	Peroxidase
Glyma.03g038300	3.82507	136.377	35.6535	5.1803e-13	Peroxidase
Glyma.03g038600	5.06053	131.293	25.9446	1.33669e-11	Peroxidase
Glyma.02g008900	0.685011	15.8328	23.1133	9.82867e-09	Peroxidase
Glyma10g01230*	0.725311	14.6622	20.2151	4.8949e-08	Peroxidase
Glyma.03g038200	6.29647	121.511	19.2983	7.39888e-10	Peroxidase
Glyma.09g284400	0.37401	6.91252	18.4821	1.91449e-05	Peroxidase
Glyma.01g130800	30.1278	545.501	18.1062	9.1185e-06	Peroxidase
Glyma.09g284700	2.07184	32.8459	15.8535	7.49651e-09	Peroxidase
Glyma.10g009400	1.0529	14.7419	14.0013	4.71543e-07	Peroxidase
Glyma.10g219800	0.0373894	13.6212	364.307	9.59563e-08	peroxidase activity
Glyma.10g191700	0.940359	11.9855	12.7457	1.81684e-06	peroxidase activity
Glyma.20g171900	0.321101	10.6039	33.0237	3.83026e-08	Peroxidase superfamily protein
Glyma.11g101200	0.365711	5.6793	15.5295	1.84526e-05	Peroxidase superfamily protein
Glyma.10g188900	1.99616	29.2478	14.652	8.04311e-07	Peroxidase superfamily protein
Glyma.10g017200	0.82987	10.3516	12.4738	3.26603e-07	Peroxidase superfamily protein
Glyma.03g233800	1.53515	16.1153	10.4975	1.69745e-06	phloem protein 2-B15
Glyma.01g097400	0.805851	16.4463	20.4087	5.49734e-10	Phosphoenolpyruvate carboxykinase
Glyma.13g045700	0.165434	5.67675	34.3143	1.41426e-07	Phosphomannose isomerase type I
Glyma.18g256900	0.236006	34.9342	148.022	6.66134e-16	PQQ enzyme repeat; oxido-reductase activity
Glyma.02g062900	0.550442	11.8435	21.5163	4.02998e-05	Predicted hydrolase/acyltransferase (alpha/beta hydrolase superfamily)
Glyma.03g033100	0.857973	24.9029	29.0253	3.03864e-06	PRENYLTRANSFERASES
Glyma.15g242400	0.256181	52.0401	203.137	2.22045e-16	Protein binding
Glyma.14g054000	0.50335	33.9018	67.3525	1.98663e-12	Protein of unknown function (DUF567)
Glyma.12g097200	0.421326	9.09186	21.5792	1.22356e-07	Protein tyrosine kinase
Glyma.08g345500	0.0617786	5.22171	84.5229	4.23639e-08	Putative serine/threonine protein kinase
Glyma.05g065200	3.49239	65.5034	18.756	1.70747e-06	Rare lipoprotein A (RlpA)-like double-psi beta-barrel
Glyma.15g167800	0.0528928	1.57266	29.7331	0.000303708	Ras suppressor protein (contains leucine-rich repeats)
Glyma.14g145900	0.268365	4.84462	18.0523	3.31594e-06	Regulator of chromosome condensation (RCC1)
Glyma.19g059000	29.4855	575.332	19.5124	4.69365e-07	RmlC-like cupins superfamily protein
Glyma.19g058900	32.6428	632.428	19.3741	1.85035e-06	RmlC-like cupins superfamily protein
Glyma.19g059700	29.0804	548.465	18.8603	1.32917e-07	RmlC-like cupins superfamily protein
Glyma.19g086100	14.5213	176.263	12.1383	2.38256e-08	RmlC-like cupins superfamily protein
Glyma.16g061300	1.58113	69.1155	43.7127	1.29474e-12	RmlC-like cupins suprfamily proteins; nutrient reservoir activity
Glyma.19g059100	31.3134	638.873	20.4026	2.82607e-08	RmlC-like cupins suprfamily proteins; nutrient reservoir activity
Glyma.19g059200	19.529	371.712	19.0339	3.39954e-08	RmlC-like cupins suprfamily proteins; nutrient reservoir activity
Glyma.19g086400	9.57192	159.016	16.6128	5.23019e-10	RmlC-like cupins suprfamily proteins; nutrient reservoir activity
Glyma.19g086200	10.2864	169.326	16.4611	6.92544e-10	RmlC-like cupins suprfamily proteins; nutrient reservoir activity
Glyma.19g086000	4.58168	48.1422	10.5075	6.66767e-07	RmlC-like cupins suprfamily proteins; nutrient reservoir activity
Glyma.04g010900	0.525872	23.2952	44.2983	4.52607e-11	S-adenosyl-L-methionine-dependent methyltransferases superfamily protein
Glyma.11g167100	0.243183	4.3965	18.0791	7.00596e-07	Serine/threonine protein kinase
Glyma.08g307400	0.221096	3.64139	16.4697	9.39573e-06	Serine/threonine protein kinase
Glyma.01g225100	1.51539	31.4566	20.7581	2.33453e-10	Serine/threonine protein phosphatase
Glyma.18g061000	0.296322	4.83621	16.3208	8.08364e-06	Serine/threonine protein phosphatase
Glyma.13g305900	6.4413	284.355	44.1457	8.85958e-14	SERINE/THREONINE RECEPTOR-LIKE PROTEIN KINAS
Glyma.13g305800	15.6306	274.997	17.5934	3.60632e-09	SERINE/THREONINE RECEPTOR-LIKE PROTEIN KINASE
Glyma.10g253800	0.494369	44.4881	89.9898	2.22045e-16	Serine/threonine receptor-like protein kinase
Glyma.08g307300	0.0397825	1.17924	29.6422	0.000309503	SERINE-THREONINE PROTEIN KINASE
Glyma.08g066200	0.12701	3.10143	24.4188	2.66877e-06	SERINE-THREONINE PROTEIN KINASE
Glyma.08g283300	0.0763988	1.8324	23.9847	0.00055693	SERINE-THREONINE PROTEIN KINASE
Glyma.05g123900	28.007	590.73	21.0922	6.90657e-06	SERINE-THREONINE PROTEIN KINASE
Glyma.05g123700	10.7594	198.638	18.4619	1.77844e-09	SERINE-THREONINE PROTEIN KINASE
Glyma.05g124000	40.7181	457.486	11.2355	0.00015313	SERINE-THREONINE PROTEIN KINASE
Glyma.03g002700	0.895978	10.0602	11.2282	3.73114e-07	SERINE-THREONINE PROTEIN KINASE
Glyma.08g128900	0.630604	6.30307	9.9953	2.43755e-06	SERINE-THREONINE PROTEIN KINASE
Glyma.08g078900	10.079	95.9701	9.52177	1.56294e-07	SERINE-THREONINE PROTEIN KINASE
Glyma.16g039600	2.67055	28.7083	10.75	6.59137e-08	spermidine hydroxycinnamoyl transferase
Glyma.07g262900	1.06469	30.7037	28.8382	4.59085e-06	Stigma-specific protein
Glyma.15g110600	0.682391	11.4923	16.8412	9.73247e-06	Stigma-specific protein
Glyma.17g011100	1.07365	14.1911	13.2176	1.00214e-05	Stigma-specific protein
Glyma.07g186000	2.72789	66.109	24.2345	1.62221e-11	SUBGROUP IIII AMINOTRANSFERASE
Glyma.10g119400	0.806325	54.236	67.2634	2.66454e-15	SUBTILISIN/KEXIN-RELATED SERINE PROTEASE
Glyma.04g171800	0.982977	9.83786	10.0083	3.58613e-06	Sugar (and other) transporter
Glyma.04g171900	0.982977	9.83786	10.0083	3.58613e-06	Sugar (and other) transporter
Glyma.04g102800	0.766422	13.2315	17.2639	2.35999e-08	SUGAR TRANSPORTER
Glyma.09g122500	0.0388064	5.07199	130.7	6.29673e-08	Terpene synthase family
Glyma.12g197400	0.149149	9.06308	60.7651	5.56702e-08	Terpene synthase family, lyase activity
Glyma.10g061000	5.60452	839.3	149.754	2.21489e-12	Thaumatin family; Pathogenesis-related
Glyma.10g061800	2.57769	345.465	134.021	1.93179e-14	Thaumatin family; Pathogenesis-related
Glyma.10g060800	4.36942	536.011	122.674	6.68681e-11	Thaumatin family; Pathogenesis-related
Glyma.18g148700	1.21183	52.9588	43.7015	1.06137e-13	Transketolase; dehydrogenase-related
Glyma.15g208600	1.07154	10.2431	9.5592	6.20875e-06	transmembrane transport
Glyma.08g235400	19.3565	436.67	22.5593	8.00436e-09	Trypsin and protease inhibitor
Glyma.16g212200	9.08881	176.472	19.4165	1.22502e-10	Trypsin and protease inhibitor
Glyma.04g121700	10.5638	553.535	52.3991	1.60634e-05	Tyrosinase
Glyma.06g270400	0.136123	1.63563	12.0158	0.000434613	TYROSINASE
Glyma.10g070300	1.87661	30.3516	16.1737	5.1972e-06	UbiA prenyltransferase family
Glyma.13g312800	0.640838	14.0874	21.9828	7.1141e-09	ubiquitin-protein ligase activity, plant U-box 23
Glyma.12g188900	0.851876	22.6046	26.5351	1.70906e-10	ubiquitin-protein ligase activity, U-box domain
Glyma.18g266100	0.0287653	16.2543	565.068	6.56697e-05	UDP-glucuronosyl and UDP-glucosyl transferase
Glyma.08g244800	5.47874	162.708	29.6981	6.67075e-11	UDP-glucuronosyl and UDP-glucosyl transferase
Glyma.18g266000	0.141157	3.05735	21.6592	1.48383e-05	UDP-glucuronosyl and UDP-glucosyl transferase
Glyma.08g107500	0.846116	13.3544	15.7832	2.93497e-08	UDP-glucuronosyl and UDP-glucosyl transferase
Glyma08g44690*	0.243168	2.71451	11.1631	0.00031379	UDP-glucuronosyl and UDP-glucosyl transferase
Glyma.05g049700	0.0283596	4.28665	151.153	7.05496e-06	Uncharacterized membrane protein; MULTIDRUG RESISTANCE PUMP
Glyma.13g231200	0.0273146	1.85775	68.0131	0.000206375	uncharacterized protein
Glyma.20g224200	1.09437	72.3283	66.0914	4.81837e-14	uncharacterized protein
Glyma.18g293500	1.19638	17.2199	14.3932	1.72117e-06	uncharacterized protein
Glyma.20g130100	7.86326	111.237	14.1465	0.000267081	uncharacterized protein
Glyma.10g285400	0.812704	11.3136	13.921	1.46984e-05	uncharacterized protein
Glyma.05g142900	1.90825	24.8777	13.0369	2.62472e-06	uncharacterized protein
Glyma.20g103600	0.54298	5.86995	10.8106	0.000149012	uncharacterized protein
Glyma.18g118300	0.986858	10.4383	10.5773	4.34402e-05	uncharacterized protein
Glyma.13g108800	6.9396	69.0826	9.95485	3.93956e-07	uncharacterized protein
Glyma13g16880*	6.9396	69.0826	9.95485	3.93956e-07	uncharacterized protein
Glyma.20g030700	5.28579	51.5155	9.74607	2.45722e-07	uncharacterized protein
Glyma.04g137100	2.13563	130.829	61.2603	6.33693e-12	Unknown
Glyma.01g236200	0.195798	4.28107	21.8648	0.000275067	Unknown protein
Glyma.19g246700	1.41135	16.925	11.9921	9.69885e-06	VQ motif
Glyma.14g124800	2.62374	24.8633	9.47627	1.40882e-05	VQ motif
Glyma.05g177700	0.104947	2.14083	20.399	0.000395794	ZINC FINGER PROTEIN
