# Supplementary material for: Tanscriptomic Study of the Soybean-Fusarium virguliforme Interaction Revealed a Novel Ankyrin-Repeat Containing Defense Gene, Expression of Whose during Infection Led to Enhanced Resistance to the Fungal Pathogen in Transgenic Soybean Plants
Source: PLoS One. 2016 Oct 19;11(10):e0163106. doi: 10.1371/journal.pone.0163106 (PMC5070833; doi:10.1371/journal.pone.0163106)
Supplement: S3 Dataset — (XLSX) [file pone.0163106.s015.xlsx]

## Sheet: Sheet1
S3 Dataset. Genes up-regulated in soybean roots infected by Fusarium virguliformeat at late time periods.
Locus ID	RPKM		Fold change	P-value	Functional Annotation
	S2	S4
Glyma.15g012000	0.415158	32.9363	79	2.92e-07	ABC-2 type transporter
Glyma.04g123800	1.63938	36.6801	22	6.33e-05	Alternative oxidase activity; response ti stress; mitochondria-nucleus signaling
Glyma.16g162500	0.0534608	23.3707	437	4.74e-06	Carbon-sulfur lyase activity
Glyma.16g162400	1.37137	148.529	108	7.11e-08	Carbon-sulfur lyase activity
Glyma.13g346700	1.86116	157.045	84	3.92e-07	Chitinase -related protein
Glyma.03g247500	5.70521	462.881	81	1.03e-07	Chitinase related; defense response to fungus; pathogenesis-related
Glyma.11g124500	6.89146	175.342	25	7.52e-06	Chitinase-related
Glyma11g14140*	15.7746	406.846	26	1.44e-05	Cupin-like
Glyma.10g253600	0.730756	69.5515	95	7.61e-05	Cysteine-rich RLK (RECEPTOR-like protein kinase) 29 JGI
Glyma.15g062400	21.3371	3305.71	155	1.04e-05	Cysteine-rich secretory protein; Defense-related protein; pathogenesis-related
Glyma.15g062500	24.1182	813.926	34	2.38e-05	Cysteine-rich secretory protein; Defense-related protein; pathogenesis-related
Glyma.05g022100	4.72018	165.584	35	2.26e-06	Cytochrome P450
Glyma.06g202300	0.120626	52.0234	431	8.98e-07	Cytochrome P450 CYP2
Glyma.15g203500	2.54588	609.163	239	2.33e-08	Cytochrome P450 CYP2
Glyma.02g156100	0.78374	139.385	178	1.16e-07	Cytochrome P450 CYP2
Glyma.18g080400	1.92242	156.238	81	7e-08	Cytochrome P450 CYP2
Glyma.09g048700	2.36821	169.209	71	1.46e-07	Cytochrome P450 CYP2
Glyma.09g049200	3.21444	200.959	63	2.66e-07	Cytochrome P450 CYP2
Glyma.11g051800	1.27524	63.2295	50	1.03e-05	Cytochrome P450 CYP2
Glyma.10g114600	5.66285	246.518	44	1.77e-06	Cytochrome P450 CYP2
Glyma.09g049300	4.60158	184.709	40	1.52e-06	Cytochrome P450 CYP2
Glyma.09g048900	1.57448	50.3428	32	1.16e-05	Cytochrome P450 CYP2
Glyma.08g140600	3.89848	167.863	43	1.42e-06	Cytochrome P450 CYP2; ferrulic acid hydrolase
Glyma.05g124900	0.74178	47.4484	64	6.64e-06	FAD binding Berberine family protein; lactate dehydrogenase
Glyma.19g057700	3.19794	167.321	52	3.27e-05	germin-like protein; nutrient reservoir activity
Glyma.08g244800	3.59462	134.663	37	1.03e-06	Glucosyl/Glucuronosyl transferase
Glyma.05g137800	0.216432	31.5987	146	4.15e-05	Iron ascorbate family oxidoreductases; senescence related gene
Glyma.01g056100	2.24796	82.2404	37	1.76e-05	Iron ascorbate family oxidoreductases; senescence related gene
Glyma.19g086000	1.06063	101.952	96	2.86e-05	mlC-like cupins suprfamily proteins; nutrient reservoir activity
Glyma.19g086500	4.55881	398.871	87	1.21e-07	mlC-like cupins suprfamily proteins; nutrient reservoir activity
Glyma.19g059100	31.8678	904.086	28	2.65e-05	mlC-like cupins suprfamily proteins; nutrient reservoir activity
Glyma.16g061300	3.66989	92.5392	25	3.64e-05	mlC-like cupins suprfamily proteins; nutrient reservoir activity
Glyma.19g059200	20.8665	522.074	25	4.18e-05	mlC-like cupins suprfamily proteins; nutrient reservoir activity
Glyma.19g086400	11.9671	226.243	19	3.15e-05	mlC-like cupins suprfamily proteins; nutrient reservoir activity
Glyma.19g086200	14.8859	240.167	16	6.67e-05	mlC-like cupins suprfamily proteins; nutrient reservoir activity
Glyma.04g121700	6.55485	405.725	62	3.89e-06	Oxidoreductase activity; tyrosinase
Glyma.03g038500	4.99692	202.347	40	1.18e-06	Peroxidase
Glyma.03g038300	4.54665	166.879	37	2.57e-06	Peroxidase
Glyma.03g038600	9.36426	143.383	15	8.69e-05	Peroxidase
Glyma.01g130500	3.50131	120.818	35	3.46e-06	Peroxidase superfamily protein
Glyma.01g097400	0.760467	37.4775	49	3.51e-06	Phosphoenolpyruvate carboxykinase; purine nucleotide binding
Glyma.18g256900	0.165383	23.6033	143	2.35e-05	PQQ enzyme repeat; oxido-reductase activity
Glyma.15g242400	0.278358	34.766	125	2.19e-05	Protein binding
Glyma.13g183700	2.0948	39.837	19	6.32e-05	Serine carboxypeptidase
Glyma.13g305900	20.7427	675.376	33	5.72e-06	Serine/threonine receptor-like protein kinase
Glyma.10g253800	0.196839	33.203	169	2.64e-06	Serine/threonine receptor-like protein kinase
Glyma.10g119400	0.673362	81.3319	121	1.95e-07	SUBTILISIN/KEXIN-RELATED SERINE PROTEASE JGI
Glyma.10g061000	5.81229	1012.03	174	4.47e-08	Thaumatin family; pathogenesis-related
Glyma.10g060800	5.3118	646.843	122	1.91e-07	Thaumatin family; pathogenesis-related
Glyma.10g061800	4.73527	419.137	89	1.73e-07	Thaumatin family; pathogenesis-related
Glyma.18g148700	0.376504	41.7959	111	1.36e-06	Transketolase; dehydrogenase-related
Glyma10g44370*	2.77747	738.323	266	7.63e-06	Uncharacterized
Glyma.04g137100	8.0647	221.628	27	5.02e-05	Uncharacterized
Glyma.10g161500	7.46357	479.621	64	2.31e-07	Uncharacterized; Neurogenic locus notch protein-like OS=Zea mays
Genes with bold font are up-regulated in infected soybean roots at both and late early time period RPKM, reads per kilobase of exon model per million mapped reads.
S2, samples harvested at 10 to 24 days following water treatment; S4, samples harvested at 10 to 24 days following F. virguliforme infection.
*, Predicted in Glyma.Wm82.a1.v1.1 (Gmax1.01).
